# Supplementary material
Source: Springer Nature journal article supplement (https://www.springermedizin.de/resource/supplementary/12913_2009_1352_MOESM7_ESM.pdf/9527942)

appointment

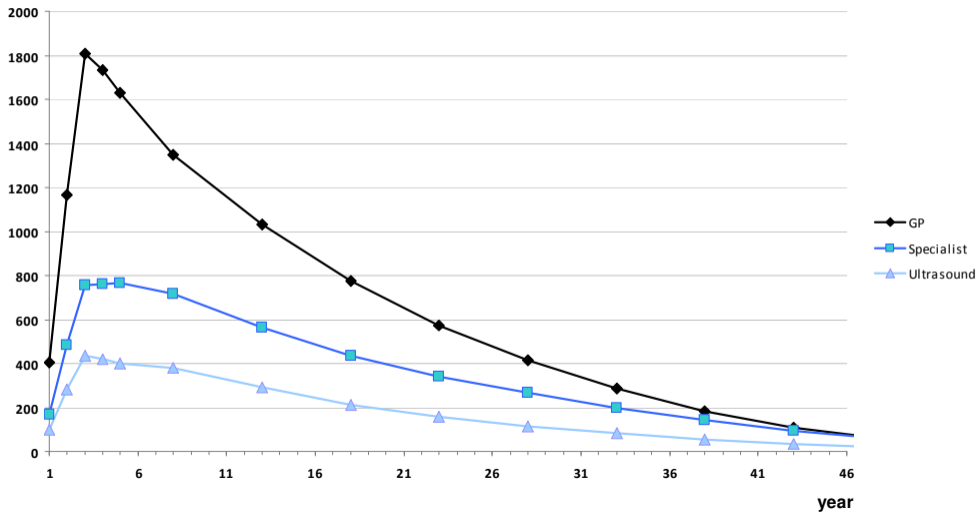

Supplement: MOESM7 [file 9527942]
